# Supplementary material for: Water-induced gel formation of an oleanlic acid–adenine conjugate and the effects of uracil derivative on the gel stability
Source: Royal Society of Chemistry journal article supplement (doi:10.1039/c2sm26085a), 2012-01-01
Supplement: c2sm26085a.pdf [file c2sm26085a.pdf]

# Supplementary Material (ESI) for Soft Matter

This journal is (c) The Royal Society of Chemistry 2012

## Water-induced gel formation of oleanic acid-adenine conjugate and the effects of uracil derivative on the gel stability

Jinrong Lu,<sup>a</sup> Jun Hu,<sup>a,b</sup> Chulong Liu,<sup>a</sup> Hongxin Gao<sup>a</sup> and Yong Ju<sup>\*a,c</sup>

<sup>a</sup> Key Laboratory of Bioorganic Phosphorus Chemistry & Chemical Biology, Ministry of Education, Department of Chemistry, Tsinghua University, Beijing 100084, China

<sup>b</sup> Department of Chemistry and Biochemistry, University of South Carolina, Columbia, SC, 29208, USA

<sup>c</sup> State Laboratory of Applied Organic Chemistry, Lanzhou University, Lanzhou 730000, China

### Contents

1. Synthesis of compound **2**
2. Synthesis of compound **3**
3. Synthesis of compound **4**
4. Synthesis of compound **5**
5. Synthesis of compound **6**
6. <sup>1</sup>H NMR spectra at different temperatures of the organogel of **4**
7. <sup>1</sup>H NMR Spectra titration and calculation of binding constant of compound **4** for **5**

## 1. Synthesis of compound **2**

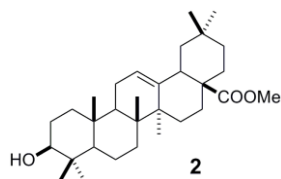

10.1g (21.4 mmol) **1** was dissolved in dry DMF (150 ml). 3.5g  $K_2CO_3$  (25.4 mmol) was added. Then 3.0 ml  $CH_3I$  (60 mmol) was added. The mixture stirred for 24 h at rt. The solution was poured into water and the resulting suspension was filtrated to give **2** (solid, 11.5 g, 95%). m. p. 203-205 °C, ESI-MS (+) :  $m/z = 493 [M+K]^+$ ;  $^1H$  NMR (300MHz,  $CDCl_3$ ): 5.25 (m, 1H, 12-H), 3.59 (s, 3H,  $CO_2CH_3$ ), 3.18 (dd, 1H,  $J_1=9.96Hz$ ,  $J_2=4.80Hz$ , 3-H), 0.69, 0.75, 0.87, 0.88, 0.90, 0.96, 1.10 ( $7 \times s$ ,  $7 \times 3H$ , 23, 24, 25, 26, 27, 29, 30- $CH_3$ );  $^{13}C$  NMR (75MHz,  $CDCl_3$ ): 178.34 (28-C), 143.84 (13-C), 122.43 (12-C), 79.02 (3-C), 55.31, 51.59, 47.70, 46.78, 45.95, 41.70, 41.36, 39.34, 38.83, 38.52, 37.10, 33.93, 33.19, 32.74, 32.45, 30.76, 28.18, 27.77, 27.26, 26.01, 23.72, 23.47, 23.14, 18.40, 16.90, 15.67, 15.37.

### 1). ESI-MS (+) Spectra of compound **2**

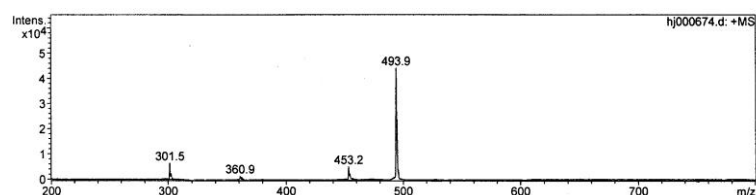

### 2). $^1H$ NMR Spectra of compound **2**( $CDCl_3$ , 300MHz)

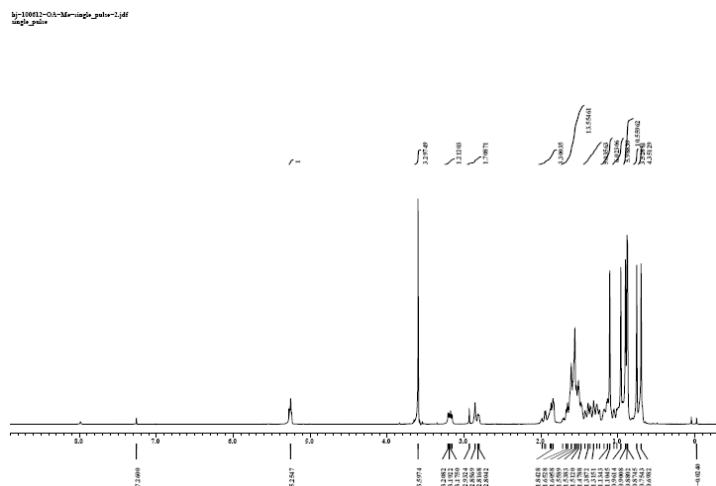

### 3). $^{13}C$ NMR Spectra of compound **2**( $CDCl_3$ , 75MHz)

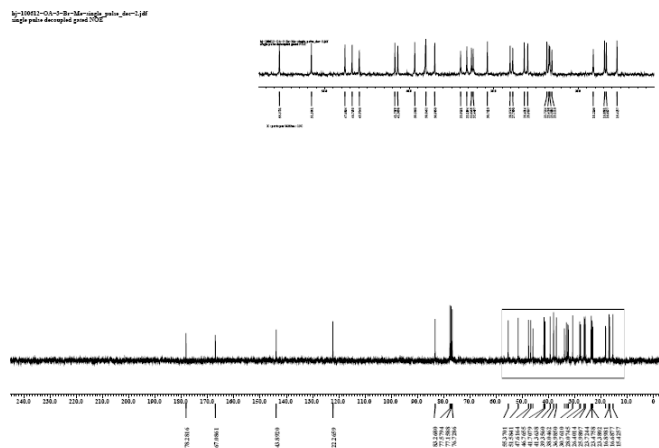

## 2. Synthesis of compound **3**

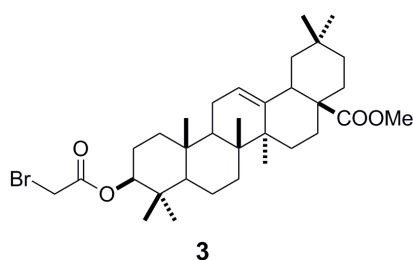

Compound **2** (1.0 g, 2.01 mmol) and  $K_2CO_3$  (300 mg, 2.17 mmol) was dissolved in dry  $CHCl_3$  (30 ml). The mixture was cooled to  $0^\circ C$ . Then 2.41 mmol of bromoacetyl bromide (2.4 ml) was added to the mixture. This reaction mixture was stirred at room temperature ( $18^\circ C$ ) for 24 h. Then the precipitates were filtered and washed with  $CH_2Cl_2$  (10 ml). The filtrates were successively washed with citric acid (10%) for three times (30 ml $\times$ 3). Joined the aqueous-phase were extracted with  $CH_2Cl_2$  (30 ml). The extracts was dried over  $MgSO_4$  and solvents were removed under reduced pressure to get pale yellow crude solid (1.344 g). The solid was purified by silica gel column chromatography ( $CH_2Cl_2$ :  $CH_3OH$  = 60:1) afforded **3** as a white solid (1.197 g, 98%). m. p.  $181-182^\circ C$ , ESI-MS (+) :  $m/z$  = 615 [ $M+Na$ ] $^+$ ;  $^1H$  NMR (300MHz,  $CDCl_3$ ): 5.25 (m, 1H, 12-H), 4.53 (t, 1H,  $J_1=8.25Hz$ ,  $J_2=7.89Hz$ , 3-H), 3.89 (dd, 2H,  $J_1=17.52Hz$ ,  $J_2=12.03Hz$ ,  $COCH_2Br$ ), 3.59 (s, 3H,  $CO_2CH_3$ ), 0.70, 0.86, 0.87, 0.90, 0.91, 1.10 (6xs , 7 $\times$ 3H, 23, 24, 25, 26, 27, 29, 30-CH3);  $^{13}C$  NMR (75MHz,  $CDCl_3$ ): 178.28 (28-C), 167.08 ( $COCH_2Br$ ), 143.89 (13-C), 122.26 (12-C), 83.26 (3-C), 55.37, 51.58, 47.61, 46.76, 45.91, 41.70, 41.36, 39.35, 38.04, 36.98, 33.93, 33.18, 32.64, 32.44, 30.76, 28.07, 27.75, 26.40, 25.98, 23.72, 23.47, 23.38, 23.13, 18.23, 16.89, 16.68, 15.42.

### 1). ESI-MS (+) Spectra of compound **3**

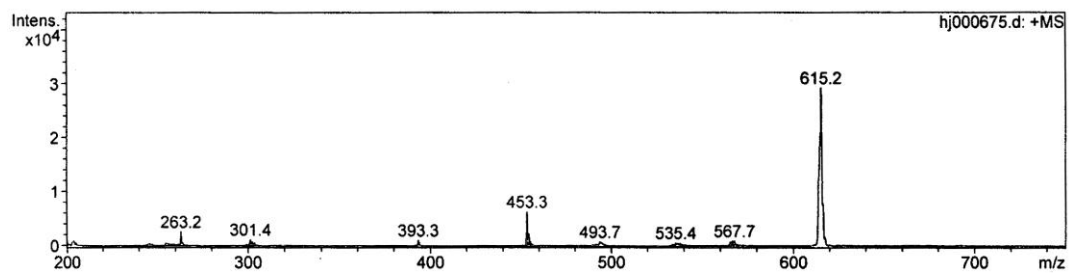

2). <sup>1</sup>H NMR Spectra of compound 3(CDCl<sub>3</sub>, 300MHz)

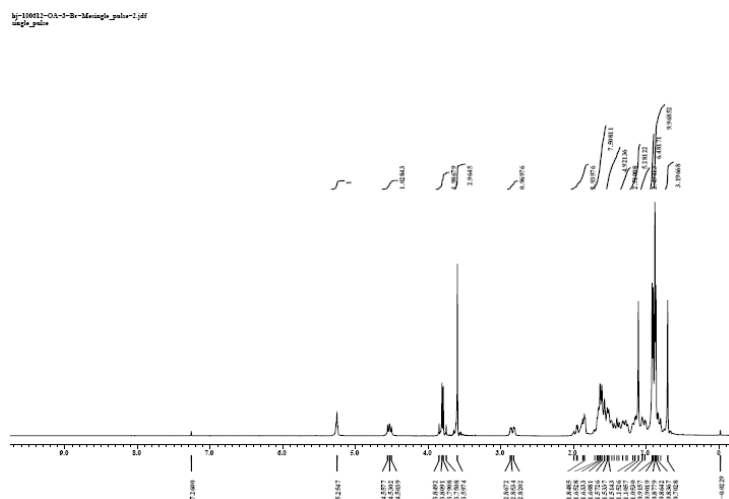

3). <sup>13</sup>C NMR Spectra of compound 3(CDCl<sub>3</sub>, 75MHz)

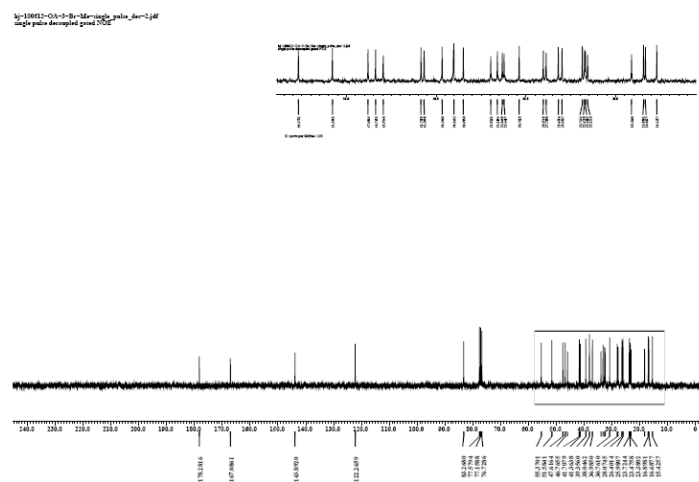

3. Synthesis of compound 4

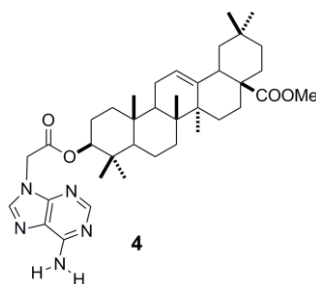

The solution of compound **3** (300 mg, 0.50 mmol) in 15mL dry DMF was added slowly to the solution of adenine(89 mg, 0.66 mmol) in 8ml dry DMF in the presence of  $\text{K}_2\text{CO}_3$  (91 mg, 0.66 mmol). This mixture solution were stirred for 9 h at rt (15°C). The mixture was poured into water, and then was extracted with  $\text{CH}_2\text{Cl}_2$  (30 ml $\times$ 3). Joined the organic extracts were washed with  $\text{H}_2\text{O}$  and brine, dried by anhydrous  $\text{MgSO}_4$  and evaporated, affording the pale yellow solid (395 mg). The solid was purified by silica gel column chromatography ( $\text{CH}_2\text{Cl}_2$ :  $\text{CH}_3\text{OH}$  = 60:1-20:1) afforded **4** as a white solid (210 mg, 60%). m. p. 302-305 °C, ESI-MS (+) :  $m/z$  = 646  $[\text{M}+\text{H}]^+$ , 668  $[\text{M}+\text{Na}]^+$ ;  $^1\text{H}$  NMR (300MHz,  $\text{CDCl}_3$ ): 8.33 (s, 1H, adenine-H), 7.78 (s, 1H, adenine-H), 6.20 (s, 2H,  $\text{NH}_2$ ), 5.24 (s, 1H, 12-H), 4.96 (s, 2H,  $\text{OCH}_2$ -adenine), 4.54 (dd,  $J_1=12.00\text{Hz}$ ,  $J_2=6.00\text{Hz}$ , 1H, 3-H), 3.59 (s, 3H,  $\text{CO}_2\text{CH}_3$ ), 0.65, 0.68, 0.79, 0.87, 0.89, 1.08 (7 $\times$ s, 7 $\times$ 3H, 23, 24, 25, 26, 27, 29, 30- $\text{CH}_3$ );  $^{13}\text{C}$  NMR (75MHz,  $\text{CDCl}_3$ ): 178.32 (30-C), 166.89 ( $\text{OCOCH}_2$ ), 155.60 (adenine-C), 153.08 (adenine-C), 150.31 (adenine-C), 143.89 (13-C), 140.97 (adenine-C), 122.21 (2C, 12-C, adenine-C), 83.73 (3-C), 72.03 ( $\text{OCH}_2$ ), 55.27, 51.60, 47.56, 46.76, 45.90, 44.56, 41.68, 41.33, 39.31, 38.02, 37.77, 36.92, 33.91, 33.17, 32.58, 32.42, 30.75, 28.13, 27.73, 25.97, 23.70, 23.48, 23.11, 18.21, 16.87, 16.53, 15.36.

### 1). ESI-MS (+) Spectra of compound **4**

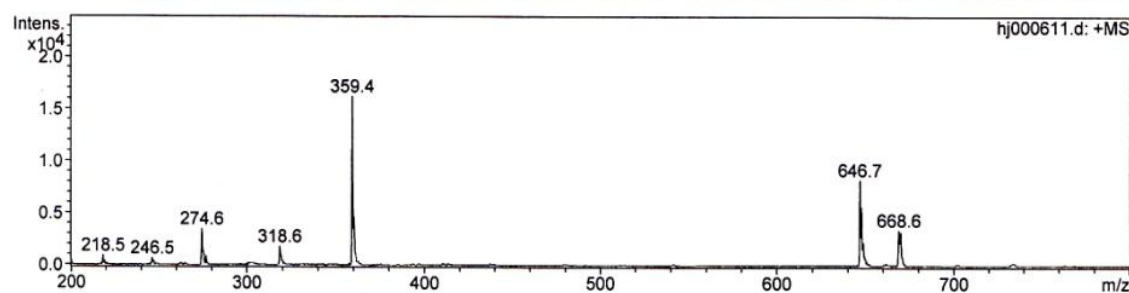

### 2). $^1\text{H}$ NMR Spectra of compound **4**( $\text{CDCl}_3$ , 300MHz)

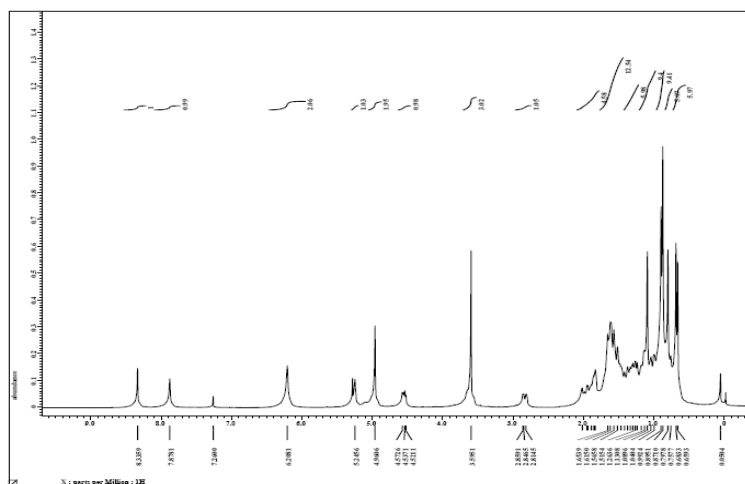

### 3). $^{13}\text{C}$ NMR Spectra of compound **4**( $\text{CDCl}_3$ , 75MHz)

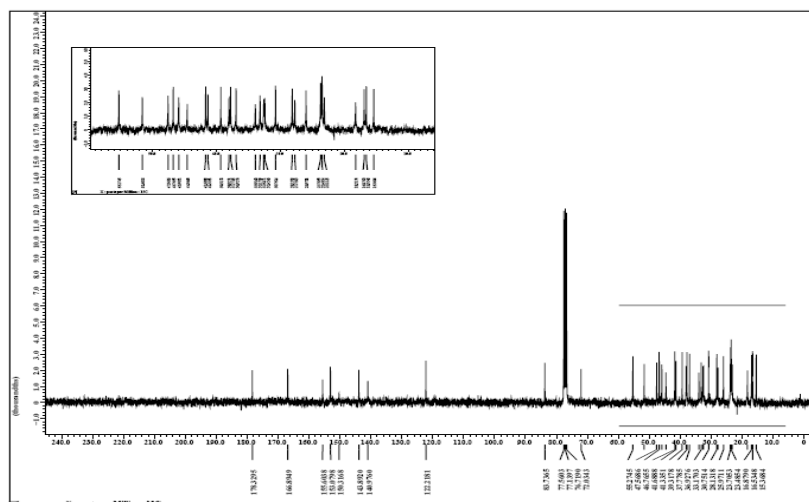

#### 4. Synthesis of compound **5**

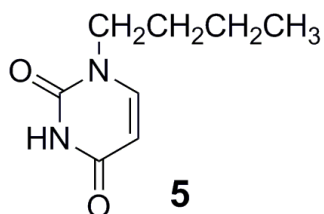

In a typical procedure, uracil (1.005 g, 8.9 mmol) was treated with n-butyl bromide (0.97 ml, 9.0mmol) in the presence of anhydrous  $K_2CO_3$  (1.240 g, 9.0 mmol) in dry DMF (50 ml) for 18 h at room temperature (22 °C). Then the precipitates was filtered and washed with  $CH_2Cl_2$ . DMF was evaporated under vacuo. The crude product obtained was dissolved in chloroform (30 ml) and washed with brine (20 ml), dried with  $Mg_2SO_4$  and evaporated to dryness under vacuum. The impure product was then purified by silica gel column chromatography (elution with  $CH_2Cl_2$ :  $CH_3OH$  = 50:1) to give 700 mg of **5** (50%). m. p. 108-111 °C, ESI-MS:  $m/z$  169.1  $[M+H]^+$ , 191.1  $[M+Na]^+$ .  $^1H$  NMR (300 MHz,  $CDCl_3$ )  $\delta$  (ppm): 0.92(t, - $CH_3$ , 2H,  $J=7.2$ Hz). 1.39(m, - $CH_2CH_2$ , 2H) 1.64(m, - $CH_2CH_2$ , 2H) 3.70(t, - $CH_2$ , 2H,  $J=7.2$ Hz) 5.52(d, uracil-5-H, 1H,  $J=7.89$ Hz) 7.14(d, uracil-6-H, 1H,  $J=7.89$ Hz)  $^{13}C$  NMR (75MHz,  $CDCl_3$ )  $\delta$  (ppm): 164.39 (uracli-1-C) 151.22 (uracil-4-C) 144.63 (uracil-6-C) 102.16 (uracil-5-C) 48.68, 31.12, 19.71, 13.70.

##### 1). ESI-MS (+) Spectra of compound **5**

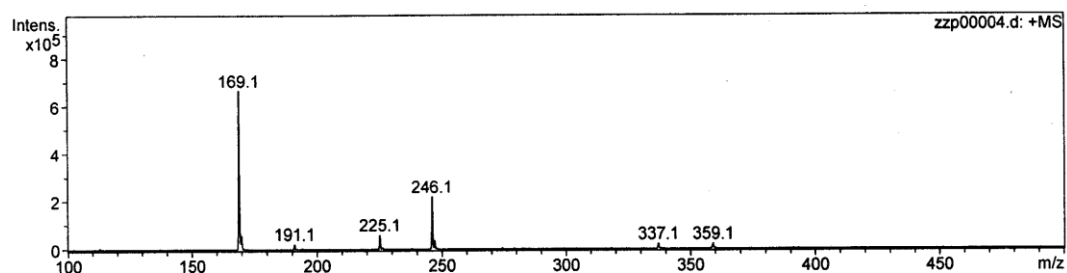

##### 2). $^1H$ NMR Spectra of compound **5**( $CDCl_3$ , 300MHz)

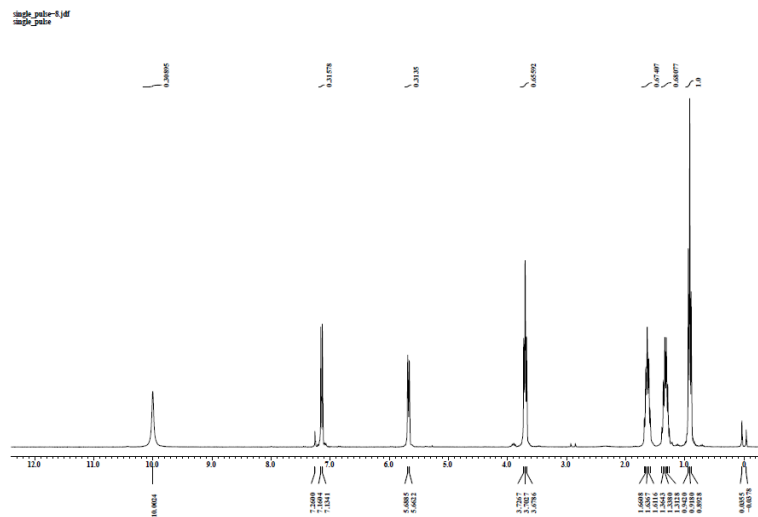

3).  $^{13}\text{C}$  NMR Spectra of compound **5**( $\text{CDCl}_3$ , 75MHz)

hjr-10-04-02-n-e-3a-single\_pulse\_dec-1.pdf  
single pulse decoupled gated NOE

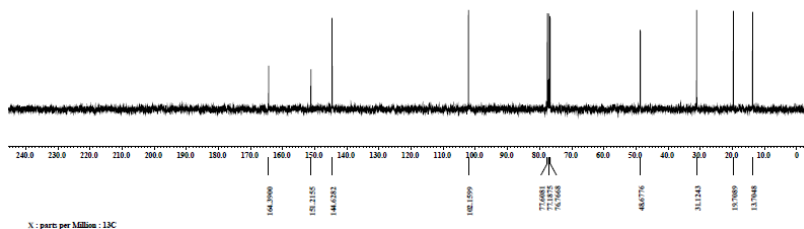

5. Synthesis of compound **6**

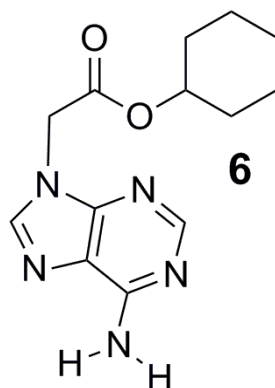

This compound was synthesized by using the same procedure as that described for **4**. m. p. 227-233 °C, ESI-MS (+) :  $m/z = 276.4$   $[\text{M}+\text{H}]^+$ , 290.3  $[\text{M}+\text{Na}]^+$ ;  $^1\text{H}$  NMR (300MHz,  $\text{DMSO}-d_6$ ): 8.13 (s, 1H, adenine-H), 8.12 (s, 1H, adenine-H), 7.30 (s, 2H,  $\text{NH}_2$ ), 5.05 (s, 2H,

OCH<sub>2</sub>-adenine), 4.75 (m, 1H); <sup>13</sup>C NMR (75MHz, DMSO-*d*<sub>6</sub>): 167.83 (OCOCH<sub>2</sub>), 156.45 (adenine-C), 153.11 (adenine-C), 150.26 (adenine-C), 141.82 (adenine-C), 118.78 (adenine-C), 73.95, 44.65, 31.38, 25.25, 23.36.

### 1). ESI-MS (+) Spectra of compound **6**

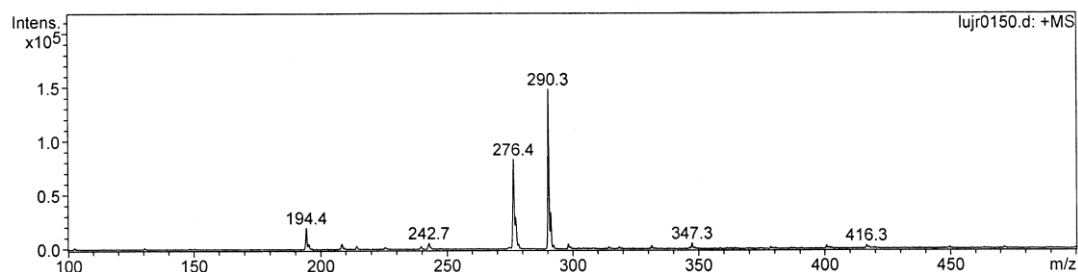

### 2). <sup>1</sup>H NMR Spectra of compound **6**(DMSO-*d*<sub>6</sub>, 300MHz)

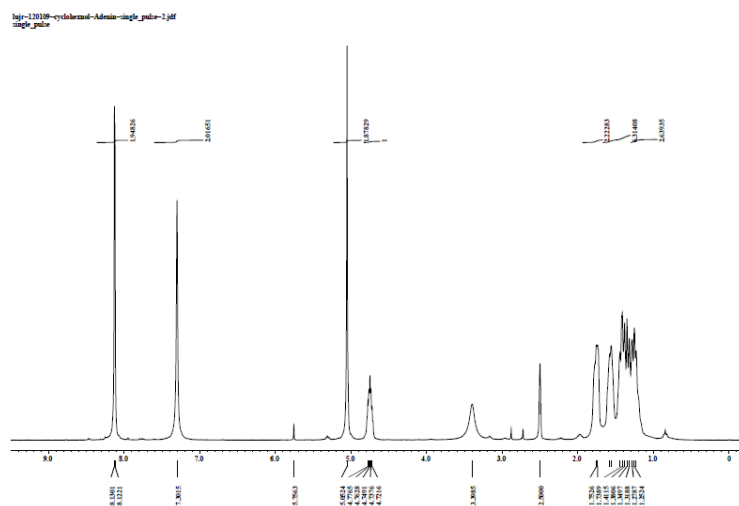

### 3). <sup>13</sup>C NMR Spectra of compound **6**(DMSO-*d*<sub>6</sub>, 75MHz)

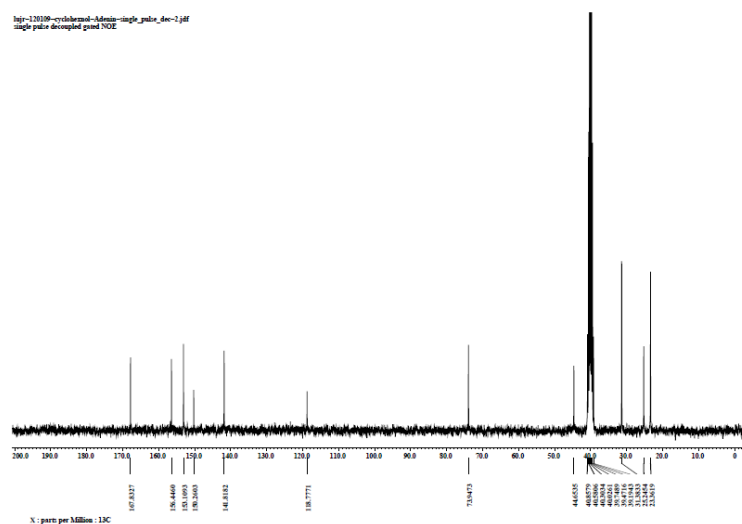

### 6. <sup>1</sup>H NMR spectra at different temperatures of the organogel of **4**



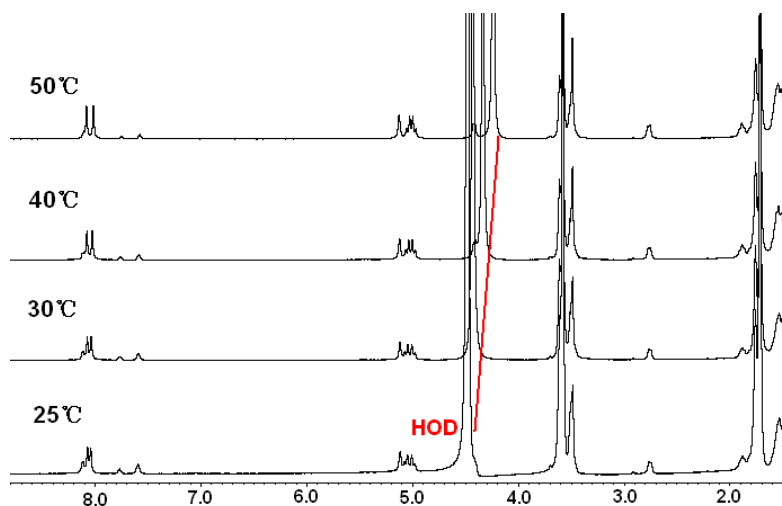

Figure S1.  $^1\text{H}$  NMR spectra at different temperatures of the organogel of **4** in  $\text{THF-}d_8$  solvent containing  $\text{D}_2\text{O}$ .

## 7. $^1\text{H}$ NMR Spectra titration and calculation of binding constant of compound **4** for **5**<sup>[1]</sup>

$^1\text{H}$  NMR spectra were recorded at 300 MHz for protons on JOEL JNM-ECA 300 spectrometers. Chemical shifts ( $\delta$ ) are given in ppm relative to TMS ( $\delta=0.0$ ).

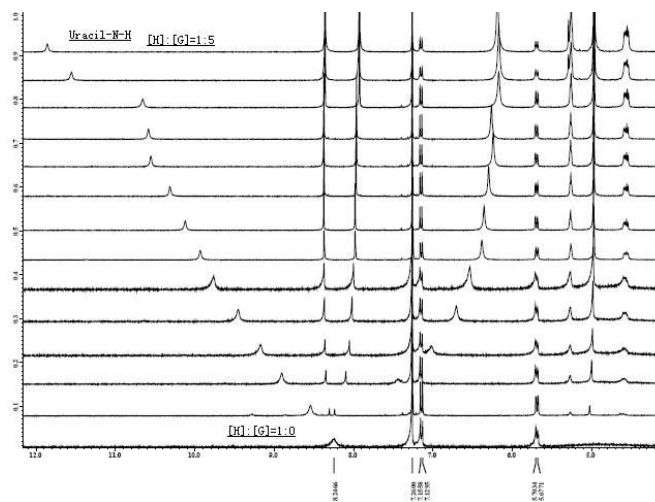

Figure S2. Partial  $^1\text{H}$  NMR spectra of the uracil derivative **5**(=[H]) (5 mM) in  $\text{CDCl}_3$  upon the addition of the compound **4**(=[G]).

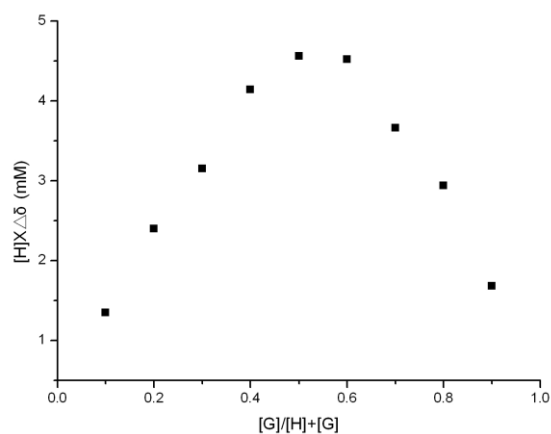

Figure S3. Job's plot showing 1:1 complex formation for compound **4** and **5**

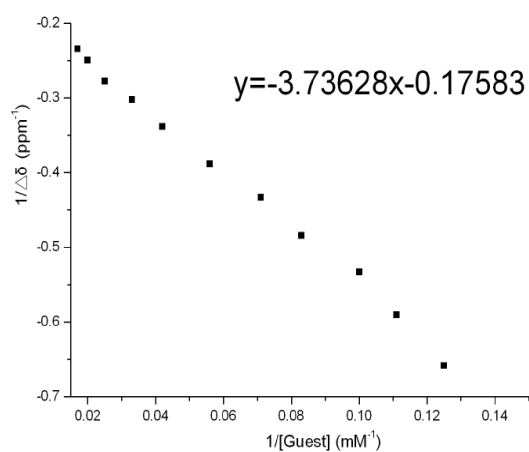

Figure S4. Hildebrand - Benesi plot based on the 1:1 for compound **4** and **5**

$$1/\Delta\delta = 1/(K_a\Delta\delta_{\max}[G]) + 1/\Delta\delta_{\max}$$

$$1/\Delta\delta_{\max} = -0.17583$$

$$1/K_a\Delta\delta_{\max} = -3.73628$$

$$K_a = 47.1 \text{ M}^{-1}$$
